# Supplementary material
Source: MDPI journal article supplement (https://www.mdpi.com/1424-2818/14/7/579)
Supplement: s1 [file s1]

**Supplementary Table S1.** Occurrence records used for MaxEnt Model of black-necked crane (*Grus nigricollis*) in Zoige Grassland Wetland Ecological Function Zone.

| <b>species</b>          | <b>longitude</b> | <b>latitude</b> |
|-------------------------|------------------|-----------------|
| <i>Grus nigricollis</i> | 102.2578         | 33.96335        |
| <i>Grus nigricollis</i> | 102.9627         | 33.57763        |
| <i>Grus nigricollis</i> | 102.5429         | 32.79654        |
| <i>Grus nigricollis</i> | 102.621          | 33.12259        |
| <i>Grus nigricollis</i> | 102.4692         | 33.40923        |
| <i>Grus nigricollis</i> | 102.3485         | 32.56587        |
| <i>Grus nigricollis</i> | 102.827          | 33.92404        |
| <i>Grus nigricollis</i> | 102.94           | 34.00106        |
| <i>Grus nigricollis</i> | 102.8617         | 33.53975        |
| <i>Grus nigricollis</i> | 102.841          | 33.9487         |
| <i>Grus nigricollis</i> | 102.6261         | 34.08282        |
| <i>Grus nigricollis</i> | 102.5412         | 33.99153        |
| <i>Grus nigricollis</i> | 103.0968         | 33.58917        |
| <i>Grus nigricollis</i> | 102.4969         | 32.7855         |
| <i>Grus nigricollis</i> | 103.2223         | 33.2371         |
| <i>Grus nigricollis</i> | 102.6097         | 33.4346         |
| <i>Grus nigricollis</i> | 102.8742         | 33.92707        |
| <i>Grus nigricollis</i> | 102.6944         | 33.57821        |
| <i>Grus nigricollis</i> | 102.3293         | 32.59266        |
| <i>Grus nigricollis</i> | 102.6073         | 33.04299        |
| <i>Grus nigricollis</i> | 102.4059         | 32.73499        |
| <i>Grus nigricollis</i> | 102.3648         | 32.44486        |
| <i>Grus nigricollis</i> | 103.2468         | 33.14757        |
| <i>Grus nigricollis</i> | 102.9104         | 33.88403        |
| <i>Grus nigricollis</i> | 102.3263         | 32.60975        |
| <i>Grus nigricollis</i> | 102.5888         | 32.84132        |
| <i>Grus nigricollis</i> | 102.8186         | 33.95293        |
| <i>Grus nigricollis</i> | 102.5019         | 33.39821        |
| <i>Grus nigricollis</i> | 102.9347         | 33.84787        |
| <i>Grus nigricollis</i> | 102.5454         | 33.25024        |
| <i>Grus nigricollis</i> | 103.1274         | 33.53688        |
| <i>Grus nigricollis</i> | 102.3557         | 32.69484        |
| <i>Grus nigricollis</i> | 102.9045         | 33.45139        |
| <i>Grus nigricollis</i> | 102.884          | 33.75249        |
| <i>Grus nigricollis</i> | 103.1788         | 33.58445        |
| <i>Grus nigricollis</i> | 102.6152         | 33.15624        |
| <i>Grus nigricollis</i> | 102.3771         | 32.7093         |
| <i>Grus nigricollis</i> | 102.6157         | 32.90915        |
| <i>Grus nigricollis</i> | 102.549          | 33.44019        |
| <i>Grus nigricollis</i> | 102.4447         | 32.33558        |
| <i>Grus nigricollis</i> | 103.2345         | 33.27324        |
| <i>Grus nigricollis</i> | 102.9366         | 33.58189        |
| <i>Grus nigricollis</i> | 102.9587         | 33.73505        |
| <i>Grus nigricollis</i> | 102.8451         | 33.53637        |
| <i>Grus nigricollis</i> | 102.5158         | 33.29223        |
| <i>Grus nigricollis</i> | 102.6853         | 33.4794         |
| <i>Grus nigricollis</i> | 102.4295         | 32.7564         |

---

|                         |          |          |
|-------------------------|----------|----------|
| <i>Grus_nigricollis</i> | 102.6014 | 33.0699  |
| <i>Grus_nigricollis</i> | 102.8133 | 33.9175  |
| <i>Grus_nigricollis</i> | 102.9117 | 33.8626  |
| <i>Grus_nigricollis</i> | 102.9192 | 33.8377  |
| <i>Grus_nigricollis</i> | 102.9062 | 33.8394  |
| <i>Grus_nigricollis</i> | 103.2238 | 33.30658 |
| <i>Grus_nigricollis</i> | 103.349  | 33.04043 |
| <i>Grus_nigricollis</i> | 102.9615 | 33.80173 |
| <i>Grus_nigricollis</i> | 102.367  | 32.473   |
| <i>Grus_nigricollis</i> | 102.551  | 33.234   |
| <i>Grus_nigricollis</i> | 102.3542 | 32.68536 |
| <i>Grus_nigricollis</i> | 102.9622 | 33.78092 |
| <i>Grus_nigricollis</i> | 102.6074 | 33.01344 |
| <i>Grus_nigricollis</i> | 103.3096 | 33.10601 |
| <i>Grus_nigricollis</i> | 102.6592 | 33.47157 |
| <i>Grus_nigricollis</i> | 102.9431 | 33.83667 |
| <i>Grus_nigricollis</i> | 102.8254 | 33.53334 |
| <i>Grus_nigricollis</i> | 102.9342 | 33.59417 |
| <i>Grus_nigricollis</i> | 102.5774 | 33.3982  |
| <i>Grus_nigricollis</i> | 102.4793 | 32.63844 |
| <i>Grus_nigricollis</i> | 102.9185 | 33.87202 |
| <i>Grus_nigricollis</i> | 102.9    | 33.89998 |
| <i>Grus_nigricollis</i> | 102.5209 | 32.78303 |
| <i>Grus_nigricollis</i> | 102.4207 | 32.74596 |
| <i>Grus_nigricollis</i> | 102.575  | 33.11821 |
| <i>Grus_nigricollis</i> | 102.6015 | 32.90065 |
| <i>Grus_nigricollis</i> | 103.0455 | 33.58288 |
| <i>Grus_nigricollis</i> | 102.9897 | 32.9883  |
| <i>Grus_nigricollis</i> | 102.7575 | 33.51788 |
| <i>Grus_nigricollis</i> | 102.8575 | 33.4994  |
| <i>Grus_nigricollis</i> | 102.4688 | 33.48203 |
| <i>Grus_nigricollis</i> | 102.9405 | 33.66459 |
| <i>Grus_nigricollis</i> | 102.5778 | 33.47622 |
| <i>Grus_nigricollis</i> | 102.7185 | 33.99485 |
| <i>Grus_nigricollis</i> | 102.8306 | 33.9125  |
| <i>Grus_nigricollis</i> | 102.7349 | 33.52258 |
| <i>Grus_nigricollis</i> | 102.6645 | 33.50797 |
| <i>Grus_nigricollis</i> | 102.906  | 33.6581  |
| <i>Grus_nigricollis</i> | 102.472  | 32.8773  |
| <i>Grus_nigricollis</i> | 102.8872 | 33.91905 |
| <i>Grus_nigricollis</i> | 102.591  | 33.42975 |
| <i>Grus_nigricollis</i> | 102.3383 | 32.65949 |
| <i>Grus_nigricollis</i> | 102.9671 | 33.6925  |
| <i>Grus_nigricollis</i> | 102.5599 | 33.21917 |
| <i>Grus_nigricollis</i> | 102.5728 | 32.81731 |
| <i>Grus_nigricollis</i> | 102.3304 | 32.67433 |
| <i>Grus_nigricollis</i> | 102.9644 | 33.5683  |
| <i>Grus_nigricollis</i> | 102.28   | 32.45    |
| <i>Grus_nigricollis</i> | 102.464  | 32.78204 |
| <i>Grus_nigricollis</i> | 102.6691 | 33.48434 |

---

|                         |          |          |
|-------------------------|----------|----------|
| <i>Grus_nigricollis</i> | 102.4059 | 32.40999 |
| <i>Grus_nigricollis</i> | 102.909  | 33.6695  |
| <i>Grus_nigricollis</i> | 103.2262 | 33.17837 |
| <i>Grus_nigricollis</i> | 103.2175 | 33.19115 |
| <i>Grus_nigricollis</i> | 102.2914 | 32.64494 |
| <i>Grus_nigricollis</i> | 102.4792 | 32.7916  |
| <i>Grus_nigricollis</i> | 102.5118 | 33.31144 |
| <i>Grus_nigricollis</i> | 102.6322 | 33.45823 |
| <i>Grus_nigricollis</i> | 102.7185 | 33.50903 |
| <i>Grus_nigricollis</i> | 102.8885 | 33.54494 |
| <i>Grus_nigricollis</i> | 102.9452 | 33.72135 |
| <i>Grus_nigricollis</i> | 102.6617 | 33.96252 |
| <i>Grus_nigricollis</i> | 102.4537 | 33.72997 |
| <i>Grus_nigricollis</i> | 103.2393 | 33.61325 |
| <i>Grus_nigricollis</i> | 102.4984 | 33.44923 |
| <i>Grus_nigricollis</i> | 102.8547 | 33.9684  |
| <i>Grus_nigricollis</i> | 102.8291 | 33.9374  |
| <i>Grus_nigricollis</i> | 102.9815 | 33.58739 |
| <i>Grus_nigricollis</i> | 102.6065 | 33.48029 |
| <i>Grus_nigricollis</i> | 102.9984 | 34.03304 |
| <i>Grus_nigricollis</i> | 102.8959 | 34.00897 |
| <i>Grus_nigricollis</i> | 102.9637 | 33.66729 |
| <i>Grus_nigricollis</i> | 102.4945 | 32.2805  |
| <i>Grus_nigricollis</i> | 102.965  | 33.70662 |
| <i>Grus_nigricollis</i> | 102.9643 | 33.72145 |
| <i>Grus_nigricollis</i> | 102.5236 | 33.55512 |
| <i>Grus_nigricollis</i> | 102.8062 | 33.97509 |
| <i>Grus_nigricollis</i> | 102.7786 | 33.99301 |
| <i>Grus_nigricollis</i> | 102.7365 | 33.99621 |
| <i>Grus_nigricollis</i> | 102.6718 | 33.98272 |
| <i>Grus_nigricollis</i> | 102.5064 | 33.75248 |
| <i>Grus_nigricollis</i> | 102.5061 | 33.74265 |
| <i>Grus_nigricollis</i> | 102.493  | 33.72143 |
| <i>Grus_nigricollis</i> | 102.4813 | 33.67511 |
| <i>Grus_nigricollis</i> | 102.5394 | 33.62832 |
| <i>Grus_nigricollis</i> | 102.5591 | 33.60677 |
| <i>Grus_nigricollis</i> | 102.5596 | 33.61902 |
| <i>Grus_nigricollis</i> | 102.562  | 33.63843 |
| <i>Grus_nigricollis</i> | 102.6501 | 33.51397 |
| <i>Grus_nigricollis</i> | 102.6421 | 33.49672 |
| <i>Grus_nigricollis</i> | 102.6038 | 33.50852 |
| <i>Grus_nigricollis</i> | 102.59   | 33.5136  |
| <i>Grus_nigricollis</i> | 102.8013 | 33.53601 |
| <i>Grus_nigricollis</i> | 102.7907 | 33.65312 |
| <i>Grus_nigricollis</i> | 102.7621 | 33.66981 |
| <i>Grus_nigricollis</i> | 102.7287 | 33.705   |
| <i>Grus_nigricollis</i> | 102.695  | 33.71692 |
| <i>Grus_nigricollis</i> | 102.7006 | 33.73966 |
| <i>Grus_nigricollis</i> | 102.7058 | 33.77577 |
| <i>Grus_nigricollis</i> | 102.7308 | 33.81442 |

---

|                         |          |          |
|-------------------------|----------|----------|
| <i>Grus_nigricollis</i> | 102.7504 | 33.82133 |
| <i>Grus_nigricollis</i> | 102.7984 | 33.81335 |
| <i>Grus_nigricollis</i> | 102.8083 | 33.82851 |
| <i>Grus_nigricollis</i> | 102.8205 | 33.83108 |
| <i>Grus_nigricollis</i> | 102.8362 | 33.83032 |

---
